# Supplementary material for: Influence of the definition of “metabolically healthy obesity” on the progression of coronary artery calcification
Source: PLoS One. 2017 Jun 2;12(6):e0178741. doi: 10.1371/journal.pone.0178741 (PMC5456095; doi:10.1371/journal.pone.0178741)
Supplement: S4 Table — (DOCX) [file pone.0178741.s006.docx]

**S4 Table.** Risk of CACS progression during follow-up period according to BMI categories

|  | Hazard ratio (HR) | | | |
| --- | --- | --- | --- | --- |
| HRd | *P*-valued | HRe | *P*-valuee |
| MHO definition I |  |  |  |  |
| Normal weighta | (reference) |  | (reference) |  |
| Overweightb | 1.260 (0.804 – 1.973) | 0.314 | 0.996 (0.629 – 1.577) | 0.985 |
| Obesityc | 2.017 (1.315 – 3.095) | 0.001 | 1.652 (1.067 – 2.558) | 0.025 |
| MHO definition II |  |  |  |  |
| Normal weighta | (reference) |  | (reference) |  |
| Overweightb | 1.256 (0.561 – 2.813) | 0.579 | 0.743 (0.294 – 1.877) | 0.530 |
| Obesityc | 1.532 (0.618 – 3.793) | 0.357 | 1.149 (0.441 – 2.996) | 0.776 |

Underweight was excluded for the current analysis as statistical power was inappropriate due to the small number of subjects with underweight.

aBMI≥ 18.5 kg/m2 and <23 kg/m2

bBMI ≥ 23 kg/m2 and <25 kg/m2

cBMI ≥25 kg/m2

dwithout adjustment

e with adjustment for age and sex

Abbreviations: CACS, coronary artery calcium score; BMI, body mass index; MHO, metabolically healthy obesity
